# Supplementary material for: Blood Pressure Control and Recurrent Stroke After Intracerebral Hemorrhage in 2002 to 2018 Versus 1981 to 1986: Population-Based Study
Source: PubMed Central journal article supplement (PMC8478103; doi:10.1161/strokeaha.121.034432), 2021-07-08
Supplement: str-52-3243-s001.pdf [file str-52-3243-s001.pdf]

**Blood pressure control and recurrent stroke after intracerebral hemorrhage in 2002-18 vs 1981-86: population-based study**

Linxin Li, Susanna M. Zuurbier, Wilhelm Kuker, Charles P Warlow, Peter M. Rothwell

**Supplemental Materials**

**Table I Annual rates of recurrent stroke and mean blood pressure during follow-up in patients with first-ever primary intracerebral haemorrhage in OCSP (1981-1986) vs. OXVASC (2002-2018)**

|                                                     | <b>OCSP</b> | <b>OXVASC</b> | <b>p</b> |
|-----------------------------------------------------|-------------|---------------|----------|
| <b>Previous hypertension</b>                        |             |               |          |
| Risks of recurrent stroke (n/per 100 patient years) | 4/8.6       | 10 (3.4)      | 0.14     |
| Mean/SD SBP during follow-up (mmHg)*                | 158.3/24.3  | 136.9/16.0    | 0.003    |
| Mean/SD DBP during follow-up (mmHg)*                | 94.0/10.5   | 76.8/10.2     | 0.0001   |
| <b>No previous hypertension</b>                     |             |               |          |
| Risks of recurrent stroke (n/per 100 patient years) | 4/10.1      | 9/2.7         | 0.05     |
| Mean/SD SBP during follow-up (mmHg)*                | 154.4/10.3  | 132.3/15.4    | 0.001    |
| Mean/SD DBP during follow-up (mmHg)*                | 84.7/13.6   | 76.7/9.2      | 0.06     |

\*in 90-day survivors.

**Table II Cumulative 5-year risks of recurrent stroke and death in OCSF (1981-1986) and OXVASC (2002-2018) in patients with first-ever primary intracerebral haemorrhage stratified by sex**

|                         | <b>OCSF</b>         | <b>OXVASC</b>       |      |                    |
|-------------------------|---------------------|---------------------|------|--------------------|
|                         | (n/cumulative risk) | (n/cumulative risk) | p    | Age/sex-adjusted p |
| <b>Recurrent stroke</b> |                     |                     |      |                    |
| Male                    | 4/25.0%             | 5/12.2%             | 0.09 | 0.04               |
| Female                  | 5/38.7%             | 7/14.3%             | 0.02 | 0.03               |
| <b>Death</b>            |                     |                     |      |                    |
| Male                    | 17/64.6%            | 65/64.9%            | 0.65 | 0.44               |
| Female                  | 27/73.0%            | 68/63.5%            | 0.04 | 0.03               |

**Table III Prevalence of disability at baseline, 1-year and 5-year follow-up in patients with first-ever primary ICH in OCSP (1981-1986) vs. OXVASC (2002-2018)**

|                                      | <b>OCSP</b><br>(n%) | <b>OXVASC</b><br>(n%) | p    | Age/sex-adjusted p |
|--------------------------------------|---------------------|-----------------------|------|--------------------|
| <b>Baseline disability</b>           |                     |                       |      |                    |
| Stratified by sex:                   |                     |                       |      |                    |
| Male                                 | 1/3.6               | 18/17.8               | 0.06 | 0.33               |
| Female                               | 5/13.5              | 32/30.2               | 0.05 | 0.07               |
| Stratified by age:                   |                     |                       |      |                    |
| <75 years                            | 2/5.9               | 8/10.4                | 0.45 | 0.47               |
| ≥75 years                            | 4/12.9              | 42/32.3               | 0.03 | 0.02               |
| <b>Death or disability at 1 year</b> |                     |                       |      |                    |
| Stratified by sex:                   |                     |                       |      |                    |
| Male                                 | 17/60.7             | 74/73.3               | 0.20 | 1.00               |
| Female                               | 32/86.5             | 88/80.7               | 0.43 | 0.55               |
| Stratified by age:                   |                     |                       |      |                    |
| <75 years                            | 20/58.8             | 45/58.4               | 0.97 | 0.85               |
| ≥75 years                            | 29/93.5             | 117/88.0              | 0.37 | 0.45               |
| <b>Death or disability at 5 year</b> |                     |                       |      |                    |
| Stratified by sex:                   |                     |                       |      |                    |
| Male                                 | 17/81.0             | 70/78.7               | 0.82 | 0.33               |
| Female                               | 29/90.6             | 85/86.7               | 0.56 | 0.93               |
| Stratified by age:                   |                     |                       |      |                    |
| <75 years                            | 21/77.8             | 44/63.8               | 0.19 | 0.17               |
| ≥75 years                            | 25/96.2             | 111/94.1              | 0.67 | 0.86               |

**Table IV Prevalence of disability at baseline, 1-year and 5-year follow-up in patients with first-ever primary ICH in OCSP (1981-1986) vs. OXVASC (2002-2018) using modified Rankin Scale >3 as a cut-off for disability**

|                               | <b>OCSP</b><br>(n%) | <b>OXVASC</b><br>(n%) | p    |
|-------------------------------|---------------------|-----------------------|------|
| Premorbid disability          | 1 (1.5%)            | 16 (7.7%)             | 0.07 |
| Death or disability at 1 year | 44 (67.7%)          | 144 (68.6%)           | 0.89 |
| Death or disability at 5 year | 45 (84.9%)          | 146 (78.1%)           | 0.28 |

All cases:

Cases with compatible GP practices:

**A. Recurrent intracerebral haemorrhage**

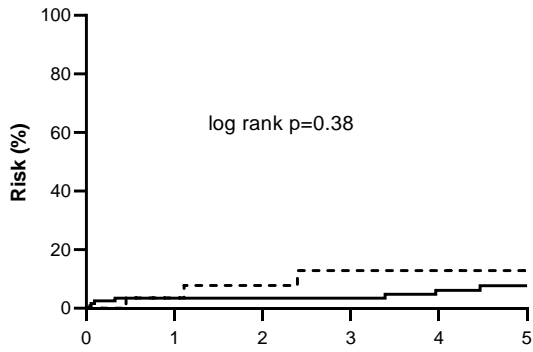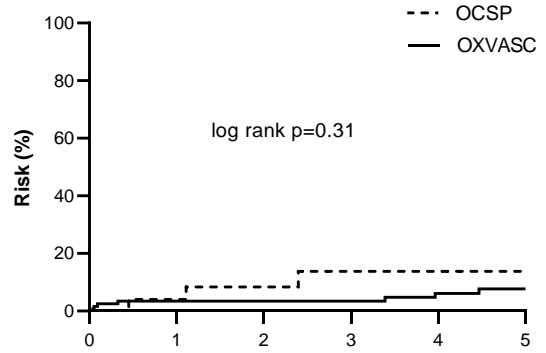

**B. Ischaemic stroke**

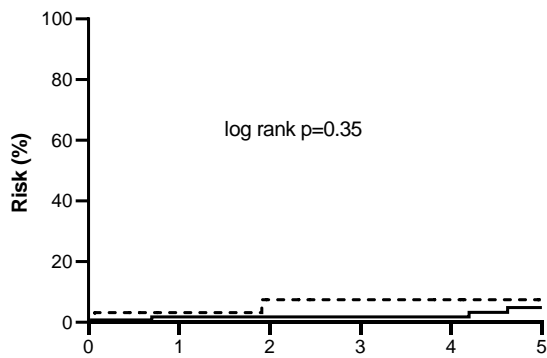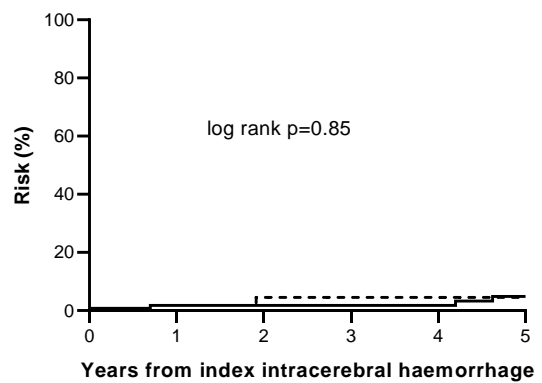

**C. Unknown stroke**

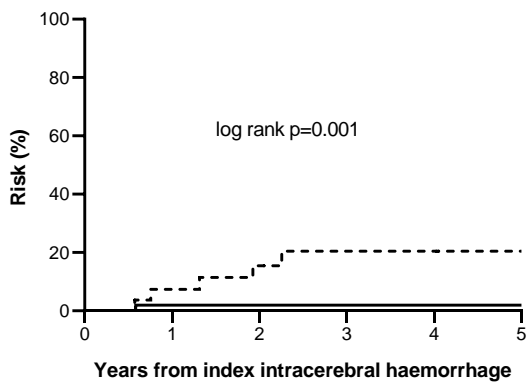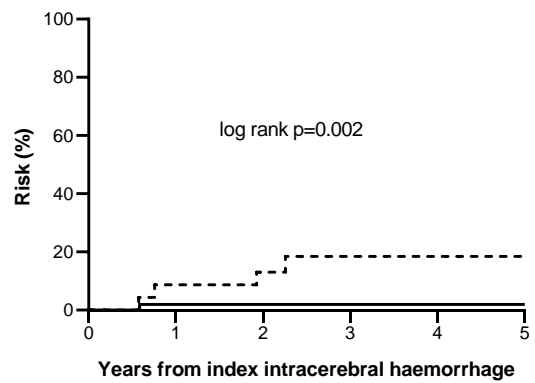

**Figure I Risks of recurrent intracerebral haemorrhage and ischaemic stroke in OCSF (1981-1986) and OXVASC (2002-2018) in patients with first-ever primary intracerebral haemorrhage**

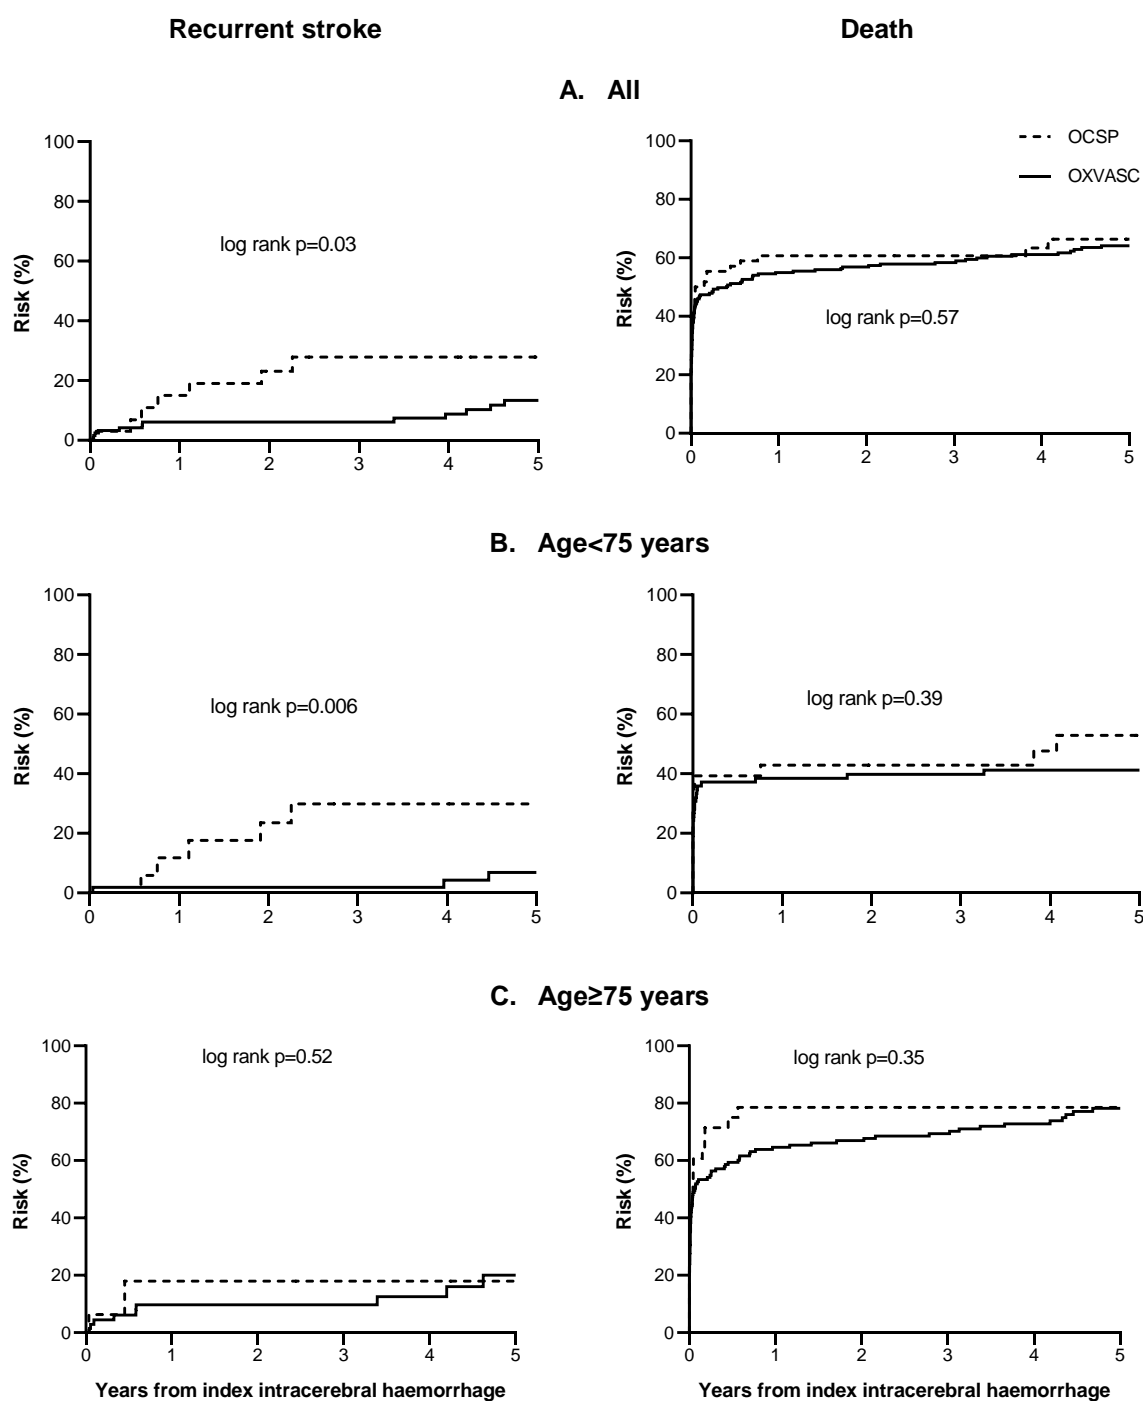

**Figure II Risks of recurrent stroke and death in OCSF (1981-1986) and OXVASC (2002-2018) in patients with first-ever primary intracerebral haemorrhage including only cases within the same GP practices in both studies**

Left panel for recurrent stroke for all patients (A), those aged <75 years (B) and those aged ≥75 years (C)  
 Right panel for death for all patients (A), those aged <75 years (B) and those aged ≥75 years (C)

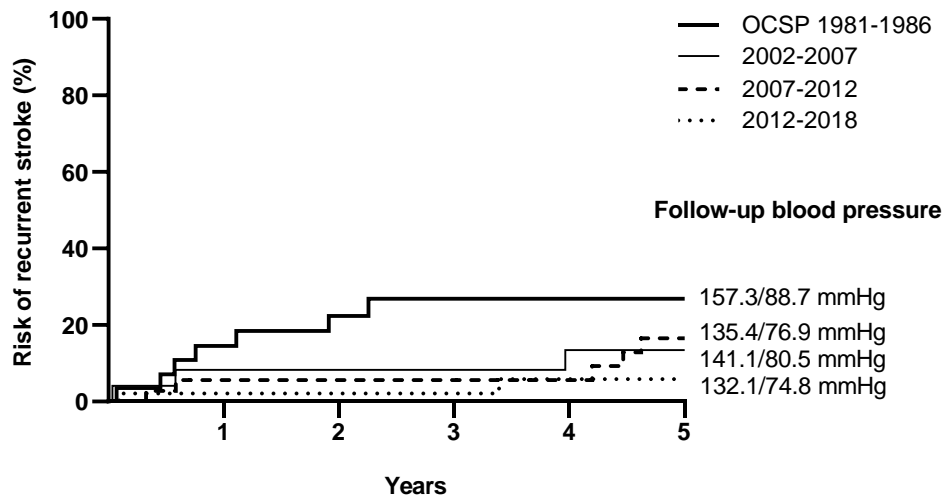

**Figure III Risks of recurrent stroke and blood pressure during follow-up in OCSP (1981-1986) and different time periods within OXVASC (2002-2018) in patients who survived the first 90 days after first-ever primary intracerebral haemorrhage**
